# Supplementary material
Source: publisher figshare collection journal article supplement (https://asha.figshare.com/articles/dataset/_/26339623)
Supplement: Supplementary file 2 [file 1]

**Supplemental Material S5.** Barriers that hinder effective communication in the ICU from patients' perspectives.

| Theme                                                               | Sub-Theme      | Number of participants<br>[ID] | Percentage<br>(N = 25) | Quote                                                                                                                                                                                                                               |
|---------------------------------------------------------------------|----------------|--------------------------------|------------------------|-------------------------------------------------------------------------------------------------------------------------------------------------------------------------------------------------------------------------------------|
| Unable to speak                                                     | Breath support | 6 [5, 15, 17, 21, 24, 25]      | 24%                    | I was not able to speak.<br><br>There was a tube in my mouth.                                                                                                                                                                       |
|                                                                     | Pain           | 1 [4]                          | 4%                     | I was in too much pain to speak.                                                                                                                                                                                                    |
| Unable to write                                                     | Weakness       | 5 [11,13, 17, 21, 24]          | 20%                    | I was too weak to write. They [providers] had a hard time reading what I wrote.                                                                                                                                                     |
|                                                                     | Restraints     | 1 [15]                         | 4%                     | My hands were restrained and there was tube in my mouth. The doctors and nurses also didn't know how to talk to me. I shook my head to tell the nurse to loose my hands. She told me that she had to do so and did not explain why. |
| Unable to point                                                     |                | 1 [11]                         | 4%                     | I was too weak to point on the spelling board. I knew they starved me to treat my pancreatitis, but I wanted to say that I am really hungry!                                                                                        |
| Lip reading is difficult                                            |                | 3 [4, 6, 22]                   | 12%                    | I had to whisper and they [providers] had to guess, which is very difficult and frustrating.                                                                                                                                        |
| Sedation and confusion                                              |                | 1 [6]                          | 4%                     | I was sedated and confused. They [providers] woke me up and asked me questions. I was very confused.                                                                                                                                |
| Limited or no access to alternative communication methods/materials |                | 2 [4, 23]                      | 8%                     | No communication system.                                                                                                                                                                                                            |
|                                                                     |                |                                |                        | My wife used to be in special ed. She asked the nurse if she could bring us some boards.                                                                                                                                            |
| Attitude barriers                                                   |                | 3 [5, 9, 17]                   | 12%                    | They don't listen.                                                                                                                                                                                                                  |
|                                                                     |                |                                |                        | I was not getting listened to.                                                                                                                                                                                                      |
|                                                                     |                |                                |                        | I tried to tell them that I can't breathe, they just told me to calm down, take a deep breath. That's not what I need.                                                                                                              |

|                                                 |                          |     |                                                                                                                                                                                          |
|-------------------------------------------------|--------------------------|-----|------------------------------------------------------------------------------------------------------------------------------------------------------------------------------------------|
| Time limit                                      | 1[9]                     | 4%  | They are so busy. They have too much paperwork to do.                                                                                                                                    |
| Emotional distress (e.g., frustration, anxiety) | 6 [4, 5, 11, 17, 22, 25] | 24% | I got a tube in my mouth. I cannot speak and it was very frustrating. I just gave up.                                                                                                    |
| Limited communication support from SLPs         | 1 [23]                   | 4%  | I had a panic attack, and I was very anxious.<br>I was seen by an SLP. She evaluated my swallowing. It could be helpful if she spends more time teaching me how to speak with the trach. |
