# Supplementary material
Source: publisher figshare collection journal article supplement (https://asha.figshare.com/articles/dataset/_/26339623)
Supplement: Supplementary file 5 [file 1]

**Supplemental Material S6.** Communication breakdowns reported by patients.

| Theme                                  | Sub-Theme          | Number of participants<br>[ID] | Percentage<br>(N = 25) | Quote                                                                                                                                                                                                                                                                                                                                                                                                                                                                                                                                                                                                                                                                                                                                                                                                                                                                                        |
|----------------------------------------|--------------------|--------------------------------|------------------------|----------------------------------------------------------------------------------------------------------------------------------------------------------------------------------------------------------------------------------------------------------------------------------------------------------------------------------------------------------------------------------------------------------------------------------------------------------------------------------------------------------------------------------------------------------------------------------------------------------------------------------------------------------------------------------------------------------------------------------------------------------------------------------------------------------------------------------------------------------------------------------------------|
| Difficulty making requests             | Items              | 2 [1, 21]                      | 8%                     | It was a mirror request. Decided it did not matter.<br><br>I asked for something, but they didn't understand me. I tried to whisper, but they did not get it.                                                                                                                                                                                                                                                                                                                                                                                                                                                                                                                                                                                                                                                                                                                                |
|                                        | Adjust positioning | 1 [17]                         | 4%                     | I tried to tell the nurse to adjust my position to a certain point. I whispered and pointed. They did not get it and I just gave up.                                                                                                                                                                                                                                                                                                                                                                                                                                                                                                                                                                                                                                                                                                                                                         |
|                                        | Contact family     | 1 [25]                         | 4%                     | I tried to ask the nurses to call my family members but they did not get it.                                                                                                                                                                                                                                                                                                                                                                                                                                                                                                                                                                                                                                                                                                                                                                                                                 |
|                                        | Bathroom           | 1 [7]                          | 4%                     | I tried to tell them that I was in pain, and I have to poop, but I can't breathe or speak. I gave up communicating the message as I understood that they were trying to save my life. They just came back and cleaned up the poop later.                                                                                                                                                                                                                                                                                                                                                                                                                                                                                                                                                                                                                                                     |
| Difficulty communicating medical needs |                    | 4 [5, 7, 9, 15]                | 16%                    | When the BIPAP was on, it wasn't put on correctly and was making a very weird noise. Causing pain. Family was here all the time advocating for her.<br><br>One time I was sitting in a chair and bleeding - I was in extreme pain, and the nurses were trying to move me from the chair to the bed. I wanted to tell them that I was in pain and felt I was going to poop. I tried to tell them that I was in pain and I have to poop, but I can't breathe or speak. I gave up communicating the message as I understood that they were trying to save my life. They just came back and cleaned up the poop later.<br><br>Yes. The corner of a tape was on my right eye lid. The doctors asked me do you always have a lazy eye? Or they suspected there were some issues going on. My hands were restrained and I got a tube in my mouth. I have no way to tell them it was just the corner |

|                                                     |               |     |                                                                                                                                                                     |
|-----------------------------------------------------|---------------|-----|---------------------------------------------------------------------------------------------------------------------------------------------------------------------|
|                                                     |               |     | of the tape. I cried. I told them what happened three days later. It was very frustrating.                                                                          |
| Giving up communicative attempts due to frustration | 2 [6, 11]     | 8%  | Emotionally distraught after failed tracheotomy, so I decided to give up communicating and just hoped for an ice chip.                                              |
| Communication difficulties with family members      | 3 [5, 11, 22] | 12% | Last weekend, when the kids were here, I was trying to talk - but the kids told me, "I am so sorry I cannot understand you". I was frustrated and gave up speaking. |
|                                                     |               |     | They (family members) were trying to figure out what I wanted to say but they end up saying I'm sorry I don't understand that.                                      |
| Avoiding further questions                          | 1 [23]        | 4%  | I always nod yes to avoid more questions from people.                                                                                                               |
